# Supplementary material
Source: publisher site journal article supplement (https://www.e-cmh.org/upload/media/cmh-2022-0316-Supplementary-Fig-6.pdf)
Supplement: Supplementary file 1 [file cmh-2022-0316-Supplementary-Fig-6.pdf]

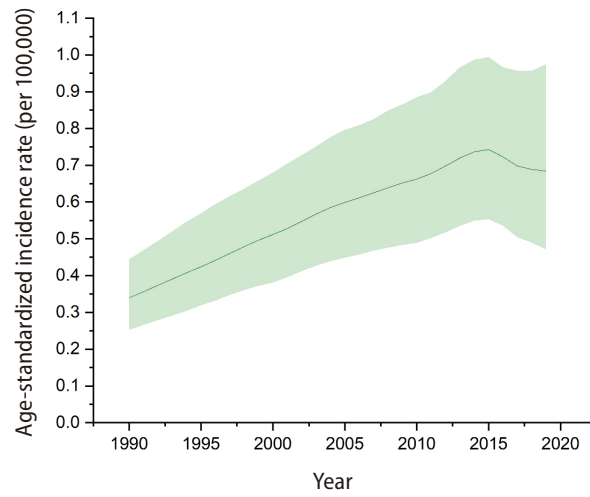

**Supplementary Figure 6.** Age-standardized incidence rate of liver cancer due to HBV in Australasia from 1990 to 2019. HBV, hepatitis B virus.
